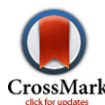

## Correction

# Correction: Effectiveness of Treatment Approaches for Children and Adolescents with Reading Disabilities: A Meta-Analysis of Randomized Controlled Trials

## The PLOS ONE Staff

In the Methods section, there are errors in Formula 1- Hedges  $g$ . The term  $(n_{EG} - 1)s_{CG}^2$  appears under the root; the correct term is  $(n_{CG} - 1)s_{CG}^2$ . In addition, the parentheses for the correction factor are missing. Please view the complete, correct formula here:

$$g = \frac{M_{EG} - M_{CG}}{\sqrt{\frac{(n_{EG} - 1)s_{EG}^2 + (n_{CG} - 1)s_{CG}^2}{n_{EG} + n_{CG} - 2}}} \left(1 - \frac{3}{4df - 1}\right)$$

## Reference

- Galuschka K, Ise E, Krick K, Schulte-Körne G (2014) Effectiveness of Treatment Approaches for Children and Adolescents with Reading Disabilities: A Meta-Analysis of Randomized Controlled Trials. PLoS ONE 9(2): e89900. doi:10.1371/journal.pone.0089900

**Citation:** The PLOS ONE Staff (2014) Correction: Effectiveness of Treatment Approaches for Children and Adolescents with Reading Disabilities: A Meta-Analysis of Randomized Controlled Trials. PLoS ONE 9(8): e105843. doi:10.1371/journal.pone.0105843

**Published:** August 12, 2014

**Copyright:** © 2014 The PLOS ONE Staff. This is an open-access article distributed under the terms of the Creative Commons Attribution License, which permits unrestricted use, distribution, and reproduction in any medium, provided the original author and source are credited.
